# Supplementary material
Source: PubMed Central journal article supplement (PMC7127976)
Supplement: NIHMS1558584-supplement-1.pdf [file NIHMS1558584-supplement-1.pdf]

***SUPPLEMENTARY MATERIALS FOR:***

**DUAL OXIDASE-INDUCED SUSTAINED GENERATION OF HYDROGEN  
PEROXIDE CONTRIBUTES TO PHARMACOLOGICAL ASCORBATE-INDUCED  
CYTOTOXICITY**

by

Adrienne R. Gibson<sup>1</sup>, Brianne R. O’Leary<sup>2</sup>, Juan Du<sup>2</sup>, Ehab H. Sarsour<sup>3</sup>, Amanda L. Kalen<sup>1</sup>,  
Brett A. Wagner<sup>1</sup>, Jeffrey M Stolwijk<sup>1</sup>, Kelly Falls-Hubert<sup>1</sup>, Matthew S. Alexander<sup>2</sup>, Rory S.  
Carroll<sup>2</sup>, Douglas R. Spitz<sup>1</sup>, Garry R. Buettner<sup>1</sup>, Prabhat G. Goswami<sup>1</sup>, and Joseph J. Cullen<sup>1,2</sup>

<sup>1</sup>From the Free Radical and Radiation Biology Division, Department of Radiation Oncology

<sup>2</sup>Department of Surgery, The University of Iowa Carver College of Medicine, Iowa City, Iowa

<sup>3</sup>Kansas City University of Medicine and Biosciences<sup>3</sup>, Kansas City, MO

\*Corresponding Author

Joseph J. Cullen, M.D.

1528 JCP, Univ. of Iowa Hospitals and Clinics

Iowa City, IA 52242. Joseph-cullen@uiowa.edu

W: (319) 353-8297, Fax: (319) 356-8378.

**Supplemental Figure 1**

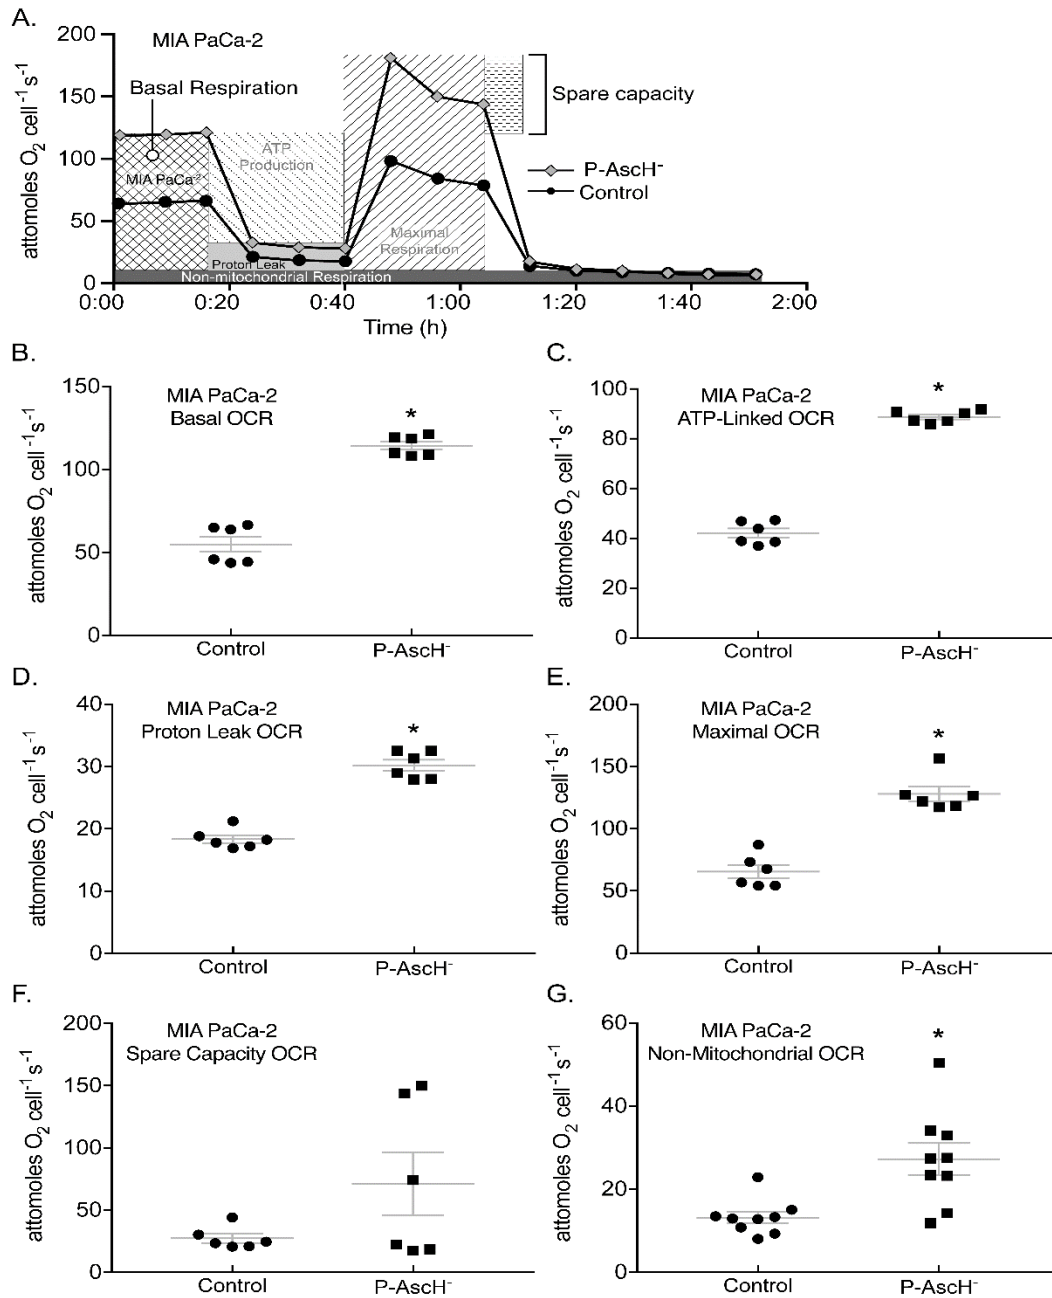

**Supplemental Figure 1. Basal oxygen consumption rate is sustained after exposure to P-AscH<sup>-</sup> in MIA PaCa-2 cells.**

**A.** MIA PaCa-2 cells treated with 1 mM P-AscH<sup>-</sup> demonstrate alterations in the mitochondrial stress test curves using the Seahorse XF96 analyzer 48 h after treatment.

**B-G.** MIA PaCa-2 cells demonstrate an increase in: basal respiration; C. ATP production; D. proton leak; E. maximal respiration; F. spare capacity and G. non-mitochondrial respiration 48 h after treatment (Means ± SEM, *n* = 6 C-G and *n* = 9 H, *p* < 0.05 vs. control, 2-tailed student's *t*-test).
