# Supplementary material
Source: PubMed Central journal article supplement (PMC7127976)
Supplement: NIHMS1558584-supplement-2.pdf [file NIHMS1558584-supplement-2.pdf]

***SUPPLEMENTARY MATERIALS FOR:***

**DUAL OXIDASE-INDUCED SUSTAINED GENERATION OF HYDROGEN  
PEROXIDE CONTRIBUTES TO PHARMACOLOGICAL ASCORBATE-INDUCED  
CYTOTOXICITY**

by

Adrienne R. Gibson<sup>1</sup>, Brianne R. O’Leary<sup>2</sup>, Juan Du<sup>2</sup>, Ehab H. Sarsour<sup>3</sup>, Amanda L. Kalen<sup>1</sup>,  
Brett A. Wagner<sup>1</sup>, Jeffrey M Stolwijk<sup>1</sup>, Kelly Falls-Hubert<sup>1</sup>, Matthew S. Alexander<sup>2</sup>, Rory S.  
Carroll<sup>2</sup>, Douglas R. Spitz<sup>1</sup>, Garry R. Buettner<sup>1</sup>, Prabhat G. Goswami<sup>1</sup>, and Joseph J. Cullen<sup>1,2</sup>

<sup>1</sup>From the Free Radical and Radiation Biology Division, Department of Radiation Oncology

<sup>2</sup>Department of Surgery, The University of Iowa Carver College of Medicine, Iowa City, Iowa

<sup>3</sup>Kansas City University of Medicine and Biosciences<sup>3</sup>, Kansas City, MO

\*Corresponding Author

Joseph J. Cullen, M.D.

1528 JCP, Univ. of Iowa Hospitals and Clinics

Iowa City, IA 52242. [Joseph-cullen@uiowa.edu](mailto:Joseph-cullen@uiowa.edu)

W: (319) 353-8297, Fax: (319) 356-8378.

Supplemental Figure 2

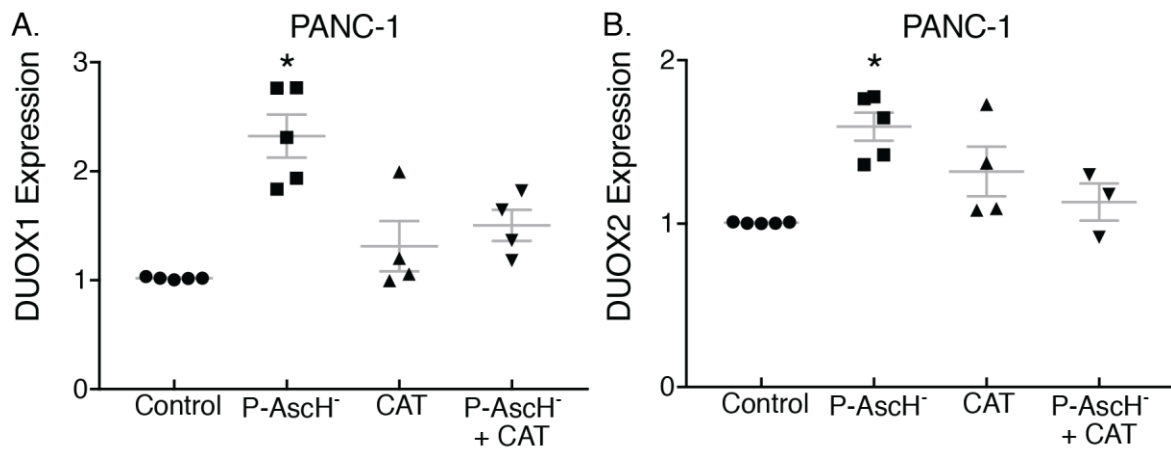

**Supplemental Figure 2. Increased *DUOX1* and *DUOX2* expression is reversed by catalase.**

**A & B.** *DUOX1* and *DUOX2* mRNA expression is increased following P-AscH<sup>-</sup> (2 mM) in PANC-1 cells and is reversed by pretreatment with 100 µg/mL bovine catalase ( $n = 4$ ,  $*p < 0.05$  vs. control, ANOVA with Tukey's multiple comparisons used).
