# Supplementary material
Source: PubMed Central journal article supplement (PMC7127976)
Supplement: NIHMS1558584-supplement-3.pdf [file NIHMS1558584-supplement-3.pdf]

***SUPPLEMENTARY MATERIALS FOR:***

**DUAL OXIDASE-INDUCED SUSTAINED GENERATION OF HYDROGEN  
PEROXIDE CONTRIBUTES TO PHARMACOLOGICAL ASCORBATE-INDUCED  
CYTOTOXICITY**

by

Adrienne R. Gibson<sup>1</sup>, Brianne R. O’Leary<sup>2</sup>, Juan Du<sup>2</sup>, Ehab H. Sarsour<sup>3</sup>, Amanda L. Kalen<sup>1</sup>,  
Brett A. Wagner<sup>1</sup>, Jeffrey M Stolwijk<sup>1</sup>, Kelly Falls-Hubert<sup>1</sup>, Matthew S. Alexander<sup>2</sup>, Rory S.  
Carroll<sup>2</sup>, Douglas R. Spitz<sup>1</sup>, Garry R. Buettner<sup>1</sup>, Prabhat G. Goswami<sup>1</sup>, and Joseph J. Cullen<sup>1,2</sup>

<sup>1</sup>From the Free Radical and Radiation Biology Division, Department of Radiation Oncology

<sup>2</sup>Department of Surgery, The University of Iowa Carver College of Medicine, Iowa City, Iowa

<sup>3</sup>Kansas City University of Medicine and Biosciences<sup>3</sup>, Kansas City, MO

\*Corresponding Author

Joseph J. Cullen, M.D.

1528 JCP, Univ. of Iowa Hospitals and Clinics

Iowa City, IA 52242. [Joseph-cullen@uiowa.edu](mailto:Joseph-cullen@uiowa.edu)

W: (319) 353-8297, Fax: (319) 356-8378.

**Supplemental Figure 3**

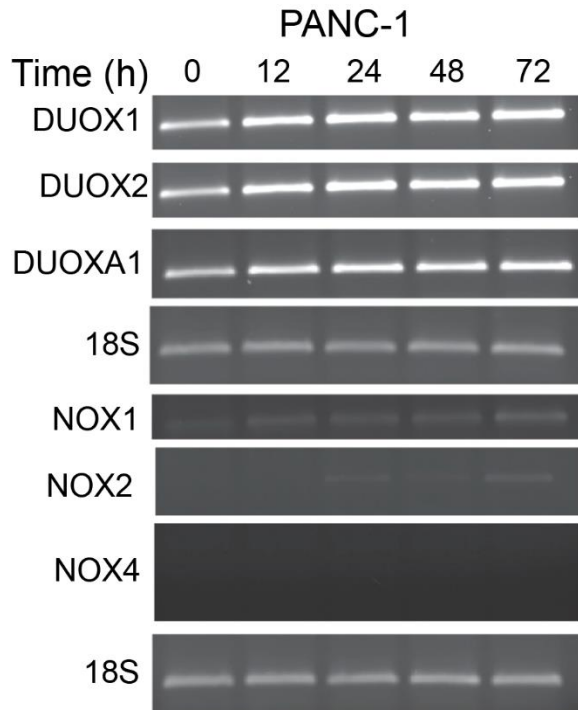

**Supplemental Figure 3. No changes in NOX enzymes are observed following P-AscH<sup>-</sup>.**

The PCR assay was used to measure expression of various *DUOXs* and *NOXs* enzymes. A time dependent increase in *DUOX1* and *DUOX2* expression in PANC-1 cells treated with 5 mM P-AscH<sup>-</sup> for 0 - 72 h. No increase was seen in *NOX1*, *NOX2*, or *NOX4* expression in PANC-1 cells treated with P-AscH<sup>-</sup> over time. As seen in Figures 3 and 4, P-AscH<sup>-</sup> treatments of PDAC cells significantly and selectively increased mRNA levels of *DUOXs* in a time and dose-dependent manner. These results demonstrate the specificity of P-AscH<sup>-</sup> selectively inducing expression of *DUOXs*.
