# Supplementary material
Source: PubMed Central journal article supplement (PMC7127976)
Supplement: NIHMS1558584-supplement-6.pdf [file NIHMS1558584-supplement-6.pdf]

***SUPPLEMENTARY MATERIALS FOR:***

**DUAL OXIDASE-INDUCED SUSTAINED GENERATION OF HYDROGEN  
PEROXIDE CONTRIBUTES TO PHARMACOLOGICAL ASCORBATE-INDUCED  
CYTOTOXICITY**

by

Adrienne R. Gibson<sup>1</sup>, Brianne R. O’Leary<sup>2</sup>, Juan Du<sup>2</sup>, Ehab H. Sarsour<sup>3</sup>, Amanda L. Kalen<sup>1</sup>,  
Brett A. Wagner<sup>1</sup>, Jeffrey M Stolwijk<sup>1</sup>, Kelly Falls-Hubert<sup>1</sup>, Matthew S. Alexander<sup>2</sup>, Rory S.  
Carroll<sup>2</sup>, Douglas R. Spitz<sup>1</sup>, Garry R. Buettner<sup>1</sup>, Prabhat G. Goswami<sup>1</sup>, and Joseph J. Cullen<sup>1,2</sup>

<sup>1</sup>From the Free Radical and Radiation Biology Division, Department of Radiation Oncology

<sup>2</sup>Department of Surgery, The University of Iowa Carver College of Medicine, Iowa City, Iowa

<sup>3</sup>Kansas City University of Medicine and Biosciences<sup>3</sup>, Kansas City, MO

\*Corresponding Author

Joseph J. Cullen, M.D.

1528 JCP, Univ. of Iowa Hospitals and Clinics

Iowa City, IA 52242. [Joseph-cullen@uiowa.edu](mailto:Joseph-cullen@uiowa.edu)

W: (319) 353-8297, Fax: (319) 356-8378.

**Supplemental Figure 6**

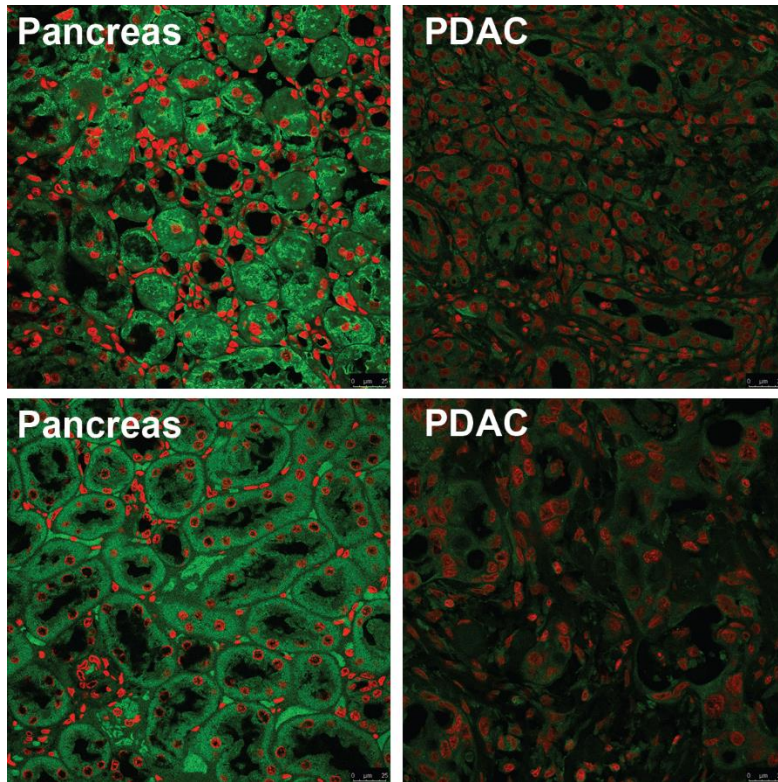

**Supplemental Figure 6. DUOX1 expression is increased in normal pancreas compared to PDAC samples.**

DUOX1 immunofluorescence staining was performed on normal pancreas from pancreatic resections for benign conditions and pancreatic resections for PDAC. Samples were visualized using a Zeiss Confocal Microscope 40x oil objective. Results indicated low DUOX1 fluorescence in PDAC samples and high expression in normal pancreas. Green staining is DUOX1 and red staining is for nuclear Topoisomerase-3.
